# Supplementary material for: Analytical method validation for assay determination of cannabidiol and tetrahydrocannabinol in hemp oil infused products by RP-HPLC
Source: Springer Nature journal article supplement (doi:10.1038/s41598-022-13737-6), 2022-07-21
Supplement: MOESM1 [file 41598_2022_13737_MOESM1_ESM.pdf]

**Title: Analytical method validation for assay determination of cannabidiol and tetrahydrocannabinol in hemp oil infused products by RP-HPLC**

Sandhyarani Analakkattillam<sup>1,2</sup>, Victor K. Langsi<sup>1</sup>, John P. Hanrahan<sup>1</sup> and Eric Moore<sup>2\*</sup>

<sup>1</sup> *Glantreo Limited, ERI Building, Lee Road, Cork City, Ireland*

<sup>2</sup> *School of Chemistry, University College Cork, Cork, Ireland*

**Supplementary Table S1: Compilation of Chromatographic conditions and percentage recovery for CBD and THC in various published methods used HPLC technique.**

Supplementary Table S1

| Ref. No.<br>(References) | Author details and DOI                                                               | Chromatographic conditions                                                  |              |                        |                      |                  |                         |                                                                                                | Study samples used                                    | Percentage Recovery |                         | Remarks                                 |
|--------------------------|--------------------------------------------------------------------------------------|-----------------------------------------------------------------------------|--------------|------------------------|----------------------|------------------|-------------------------|------------------------------------------------------------------------------------------------|-------------------------------------------------------|---------------------|-------------------------|-----------------------------------------|
|                          |                                                                                      | MP                                                                          | Elution Mode | Flow rate (mL/minutes) | Detection Wavelength | Column Oven (°C) | Total runtime (minutes) | Column dimensions                                                                              |                                                       | CBD                 | THC or Δ8-THC or Δ9-THC |                                         |
| 4                        | Zivovinovic, S., Alder, R., Allenspach, M. D. & Steuer, C. 10.1186/s40543-018-0159-8 | (A) 0.1% Formic acid in water<br>(B) 0.1% Formic acid in Acetonitrile       | Gradient     | 0.8                    | 220 nm               | 50               | 20                      | 150 x 4.6 mm<br>2.6µm<br>(Phenomenex Kinetex XB-C18)                                           | CBD-hemp tobacco samples and Forensic cannabis sample | 106.8%              | 102.7%                  |                                         |
| 16                       | Deidda, R. et al. 10.1016/j.jpba.2019.01.032                                         | 75/25 Acetonitrile/ water containing 5 mM of K2HPO4 adjusted to pH 3.45 v/v | Isocratic    | 0.38                   | 222 nm               | 53               | 6                       | 150 x 2.1 mm<br>2.7µm column & 5 x 2.1 mm<br>2.7µm Guard column (Agilent Poroshell 120 SB-C18) | Cannabis Olive oil extracts                           | 98.4% – 101.4 %     | 99.2% - 101.6%          |                                         |
| 25                       | Layton, C. E. & Aubin, A. J. 10.1080/10826076.2018.1424637                           | 45% Acetonitrile in water                                                   | Isocratic    | 0.75                   | 228 nm               | 40               | 5                       | 75 x 2.1 mm<br>1.7µm<br>(ACQUITY UPLC CSH Fluoro-Phenyl)                                       | CBD Isolates                                          | 99% - 102%          | Not reported            | UPLC method and not transferred to HPLC |

|    |                                                                |                                                                               |           |      |             |               |    |                                                                               |                                                          |                |                |                                                   |
|----|----------------------------------------------------------------|-------------------------------------------------------------------------------|-----------|------|-------------|---------------|----|-------------------------------------------------------------------------------|----------------------------------------------------------|----------------|----------------|---------------------------------------------------|
| 26 | De Backer, B. et al.<br>10.1016/j.jchroomb.2009.11.004         | Methanol/50 mM ammonium formate buffer pH 5.19                                | Gradient  | 0.3  | 200 – 400nm | 30            | 36 | 250 x 2.1 mm 5µm column & 10 x 2.1 mm 5µm guard column (Waters XTerra MS C18) | Cannabis plant material                                  | 109.1 ± 2.3 %  | 104.0 ± 2.1 %  |                                                   |
| 27 | Ambach, L. et al.<br>10.1016/j.forsciint.2014.06.008           | 64/36 Acetonitrile/ 25 mM triethylammonium phosphate buffer                   | Isocratic | 1.0  | 210 nm      | Not mentioned | 18 | LiChroCart 125-4, 5mm with LiChrospher 60, RP-Select B, 5µm Pre-column        | Seized cannabis product (cannabis plant and oil samples) | Not reported   | Not reported   |                                                   |
| 28 | Patel, B., Wene, D. & Fan, Z. T.<br>10.1016/j.jpba.2017.07.021 | (A) 25 mM ammonium acetate pH 4.75 adjusted with acetic acid.<br>(B) Methanol | Gradient  | 0.70 | 235 nm      | 30            | 10 | 75 x 3.0 mm 2.7µm (Agilent Poroshell 120 SB-C18)                              | Cannabis flower samples                                  | 87.6% - 107.0% | 81.2% - 102.7% |                                                   |
| 29 | Fekete, S. et al.<br>10.1016/j.jpba.2018.03.059                | (A) 20 mM ammonium acetate pH 5.8<br>(B) Acetonitrile                         | Gradient  | 0.57 | 220 nm      | 50            | 12 | 100 x 2.1 mm 1.7µm (BEH Shield RP18)                                          | Cannabis sativa colas                                    | Not reported   | Not reported   | Focused on Method optimization and not validation |
| 30 | Citti, C. et al.<br>10.1016/j.jpba.2017.11.044                 | (A) 0.1% Formic acid in water<br>(B) 0.1% Formic acid in acetonitrile         | Gradient  | 0.4  | 228 nm      | 25            | 15 | 100 x 3.0 mm 2.7µm (Agilent Poroshell 120 EC-C18)                             | Hemp seed oils                                           | 89.7% - 99.6%  | 91.0 % - 99.6% |                                                   |

|    |                                                                     |                                                                       |           |     |        |               |                                        |                                                          |                                                 |               |                |                                                                                             |
|----|---------------------------------------------------------------------|-----------------------------------------------------------------------|-----------|-----|--------|---------------|----------------------------------------|----------------------------------------------------------|-------------------------------------------------|---------------|----------------|---------------------------------------------------------------------------------------------|
| 31 | Mudge, E. M., Murch, S. J. & Brown, P. N. 10.1007/s00216-017-0256-3 | (A) 10 mM ammonium formate, pH 3.6<br>(B) Acetonitrile                | Gradient  | 0.6 | 220 nm | Not mentioned | 15 minutes and 7 minutes equilibration | 100 x 3.0 mm 1.7µm (Phenomenex Kinetex C18)              | Cannabis flowers and oils                       | 91.3% - 95.5% | 90.7% - 99.2%  | Autosampler at 4°C                                                                          |
| 32 | Layton, C. & Reuter, W. M. PerkinElmer Application Note             | (A) 0.1% Formic acid in water<br>(B) 0.1% Formic acid in acetonitrile | Gradient  | 1.0 | 210 nm | 50            | 8 minutes and 7 minutes equilibration  | 150 x 4.6 mm 3.0µm (PerkinElmer Brownlee Analytical C18) | Hemp seed oil                                   | 91.0% - 95.6% | 96.6% - 110.2% |                                                                                             |
| 33 | De Vita, D. et al. 10.1080/14786419.2019.1601194                    | 80/20 Acetonitrile/water (0.1% Trifluoroacetic acid) v/v              | Isocratic | 1.0 | 220 nm | 30            | 11                                     | 150 x 4.6 mm 3.5µm (Waters Symmetry C18)                 | Industrial hemp and medicinal cannabis extracts | Not reported  | Not reported   | This article focused on extraction techniques, hence full validation testing not conducted. |

|    |                                                                   |                                                                     |           |     |                |    |                                         |                                                                             |                                                 |              |              |                                                                                                   |
|----|-------------------------------------------------------------------|---------------------------------------------------------------------|-----------|-----|----------------|----|-----------------------------------------|-----------------------------------------------------------------------------|-------------------------------------------------|--------------|--------------|---------------------------------------------------------------------------------------------------|
| 34 | Aubin, A. J., Layton, C. & Helmueller, S. Waters Application Note | 59/41 Acetonitrile/ 0.1% Trifluoroacetic acid in water v/v          | Isocratic | 2.0 | 228 nm         | 35 | 26                                      | 150 x 4.6 mm 2.7µm (Cortecs Shield RP18)                                    | Cannabis plant materials and extracts           | Not reported | Not reported | This application note, only linearity test performed, and no other validation parameters studied. |
| 35 | Pellati, F. et al. 10.3390/molecules23102639                      | (A) 0.1% Formic acid in water. (B) 0.1% Formic acid in acetonitrile | Gradient  | 0.4 | 210 and 220 nm | 30 | 22 minutes and 15 minutes equilibration | 150 x 3.0 mm 2.7µm (Ascentis Express C18)                                   | Hemp inflorescences                             | 90.84 ± 0.60 | Not reported |                                                                                                   |
| 36 | Lehmann, T. & Brenneisen, R. 10.1080/10826079508009265            | (A) 8.64 g/L orthophosphoric Acid (85%) in water (B) Acetonitrile   | Gradient  | 0.2 | 210 and 224 nm | 40 | 60                                      | 200 x 2.0 mm column with a 20 x 2.0 mm guard column (Spherisorb ODS-1, 3µm) | Herbal cannabis, cannabis resin or cannabis oil | Not reported | Not reported |                                                                                                   |

|    |                                                         |                                                                                    |           |     |        |    |    |                                                                              |                                                    |               |               |                    |
|----|---------------------------------------------------------|------------------------------------------------------------------------------------|-----------|-----|--------|----|----|------------------------------------------------------------------------------|----------------------------------------------------|---------------|---------------|--------------------|
| 37 | Mandrioli, M. et al.<br>10.3390/molecules24112113       | (A) 0.085% phosphoric acid in water<br>(B) 0.085% phosphoric acid in acetonitrile. | Gradient  | 1.6 | 220 nm | 35 | 10 | 150 × 4.6 mm 2.7µm with 5 × 4.6 mm 2.7µm guard column (Nex-Leaf CBX Potency) | Cannabis sativa L. inflorescences                  | 84.92%        | 99.7% - 100%  | Autosampler at 4°C |
| 38 | Saingam, W. & Sakunpak, A.<br>10.1016/j.bjp.2018.08.001 | 85/15 Methanol/Water v/v                                                           | Isocratic | 1.0 | 220 nm | 25 | 10 | 100 x 4.6 mm 3.5µm (ZorbaxC-18)                                              | Cannabis extract and oromucosal spray formulation. | 95.6% - 97.1% | 97.3% - 99.3% |                    |
| 39 | Zgair, A. et al                                         | 62/38 acetonitrile/water v/v                                                       | Isocratic | 1.0 | 220 nm | 55 | 20 | 150 x 4.6 mm 3µm column with 3µm guard cartridge (ACE C18-PFP)               | Rat plasma                                         | 86.2% - 91.0% | 86.7% - 94.6% | Autosampler at 4°C |
